# Supplementary material for: The Slavcleft: A Three-Center Study of the Outcome of Treatment of Cleft Lip and Palate Considering Palatal Shape
Source: MDPI journal article supplement (doi:10.3390/jcm12185985), 2023-09-15
Supplement: s1 [file s1]

**Supplementary Table S1.** Non-trivial principal components in the whole sample.

| PC   | Variance       | % variance | broken-stick | Avg-Rnd         | Rnd-Lambda |
|------|----------------|------------|--------------|-----------------|------------|
| 1    | 0.0034644624   | 23,9%      | 1.0%*        | 2.7399342E-004* | 0.01000*   |
| 2    | 0.0026814402   | 18,5%      | 0.9%*        | 2.5654631E-004* | 0.01000*   |
| 3    | 0.0015742568   | 10,9%      | 0.8%*        | 2.3856272E-004* | 0.01000*   |
| 4    | 0.0010751396   | 7,4%       | 0.7%*        | 2.2769531E-004* | 0.01000*   |
| 5    | 0.00076865929  | 5,3%       | 0.7%*        | 2.1958328E-004* | 0.01000*   |
| 6    | 0.00067099196  | 4,6%       | 0.7%*        | 2.1382041E-004* | 0.01000*   |
| 7    | 0.00052213226  | 3,6%       | 0.7%*        | 2.0856309E-004* | 0.01000*   |
| 8    | 0.00044866398  | 3,1%       | 0.6%*        | 2.0404114E-004* | 0.01000*   |
| 9    | 0.00033894868  | 2,3%       | 0.6%*        | 1.9905460E-004* | 0.01000*   |
| 10   | 0.00030984105  | 2,1%       | 0.6%*        | 1.9546957E-004* | 0.01000*   |
| 11   | 0.00026809605  | 1,8%       | 0.6%*        | 1.9171307E-004* | 0.01000*   |
| 12   | 0.00022236808  | 1,5%       | 0.6%*        | 1.8776728E-004* | 0.01000*   |
| 13   | 0.00019945744  | 1,4%       | 0.6%*        | 1.8465737E-004* | 0.01000*   |
| 14   | 0.00017014075  | 1,2%       | 0.6%*        | 0.00018186965   | 1          |
| 15   | 0.0001394306   | 1,0%       | 0.5%*        | 0.00017869564   | 1          |
| 16   | 0.0001227475   | 0,8%       | 0.5%*        | 0.00017575226   | 1          |
| 17   | 0.00010510231  | 0,7%       | 0.5%*        | 0.00017266432   | 1          |
| 18   | 0.00010381862  | 0,7%       | 0.5%*        | 0.00017003086   | 1          |
| 19   | 0.000092748292 | 0,6%       | 0.5%*        | 0.0001679759    | 1          |
| 20   | 0.000073045027 | 0,5%       | 0.5%*        | 0.00016491115   | 1          |
| sum: |                | 91.9%      |              |                 |            |

\* denotes non-trivial PC.
